# Supplementary material for: Er3+/Yb3+ co-doped nanocrystals modified with 6-aminocaproic acid for temperature sensing in biomedicine
Source: Royal Society of Chemistry journal article supplement (doi:10.1039/c9ra08447a), 2019-01-01
Supplement: c9ra08447a1.pdf [file c9ra08447a1.pdf]

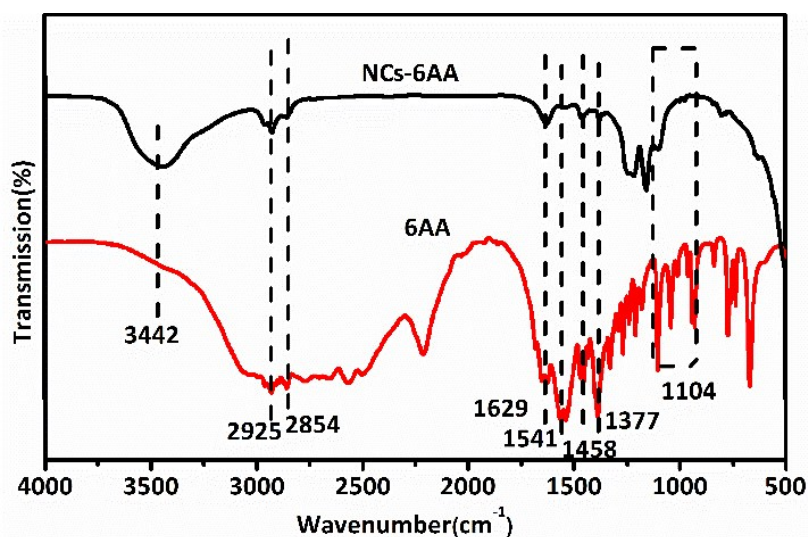

Fig. S1 FT-IR spectra of NCs modified with 6AA and pure 6AA.

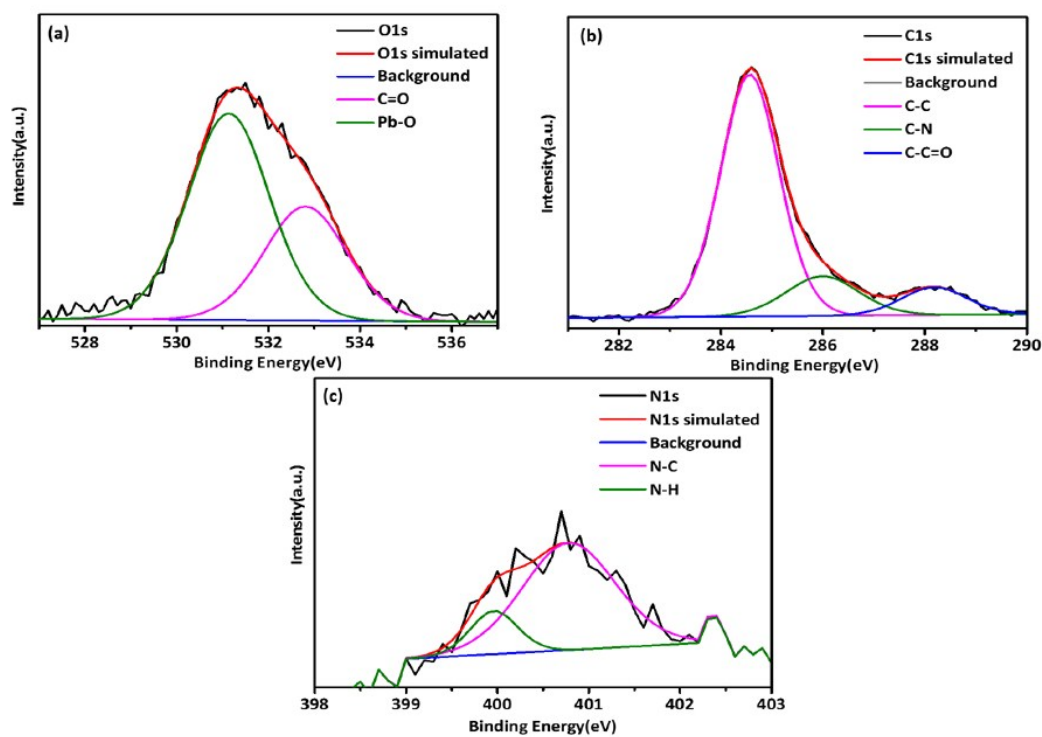

Fig. S2 High-resolution (a)O1s, (b) C1s, and (c) N1s XPS spectra of NCs modified with 6AA.
